# Supplementary material
Source: PubMed Central journal article supplement (PMC9339578)
Supplement: NIHMS1776865-supplement-Data_explanation_Memo.pdf [file NIHMS1776865-supplement-Data_explanation_Memo.pdf]

# Data Explanation for Exploring the Longitudinal Clustering of Lifestyle Behaviors, Social Determinants of Health, and Depression

## Dataset availability

Data is made available for the public on the ICPSR website.

- *“The public-use data files in this collection are available for access by the general public. Access does not require affiliation with an ICPSR member institution.”*

The list of MIDUS studies is located here: <https://www.icpsr.umich.edu/web/ICPSR/series/203>

- The data from Wave 1 is located here: <https://www.icpsr.umich.edu/web/ICPSR/studies/2760>
- The data from Wave 2 is located here: <https://www.icpsr.umich.edu/web/ICPSR/studies/4652>
- The data from Wave 3 is located here: <https://www.icpsr.umich.edu/web/ICPSR/studies/36346>

## Syntax files

The syntax for the analyses are made available as well. The first file, **Data processing 1.3.R** includes the script for cleaning/manipulating the raw data files. The second file, **Network models 1.1.R** contains the script for analyzing the cleaned dataset.

Important R packages and associated links that supported the analysis include:

- R v4.0.2
- Rstudio v1.4.1103
- tidyverse v1.3.0
- tidylog v1.0.2
- psych v2.0.12
- mice v3.13.0 [link](#)
- micemd v1.6.0 [link](#)
- BGGM v2.0.3 [link](#)
- qgraph v1.6.9 [link](#)

## Analysis output

The analyses output are made available in the **Analyses output.pdf** document.
